# Supplementary material
Source: PubMed Central journal article supplement (PMC2993205)
Supplement: table.pdf [file table.pdf]

1 **Table S1. Clinical Characteristics of the Patients Whose Heart Samples Were Used**

| 2  |               | Patient | Age | Sex | Race | Diagnosis   | EF* | Hypertension | HW (g) | BW (kg) |
|----|---------------|---------|-----|-----|------|-------------|-----|--------------|--------|---------|
| 3  | Non-failing   | D117    | 60  | M   | W    | CVA         | N/A | no           | 694    | 96      |
| 4  |               | D134    | 42  | M   | W    | MVA         | N/A | no           | N/A    | 78      |
| 5  |               | D139    | 50  | M   | W    | Head trauma | 60  | no           | 164    | 74      |
| 6  |               | D155    | 50  | M   | W    | CVA         | 70  | yes          | 410    | 93      |
| 7  |               | D157    | 43  | M   | W    | CVA         | N/A | no           | 420    | 90      |
| 8  |               | D159    | 44  | F   | W    | MVA         | 55  | yes          | 244    | 52      |
| 9  |               | D170    | 57  | M   | W    | CVA         | N/A | yes          | 360    | 56      |
| 10 |               | D171    | 36  | M   | W    | GSW-head    | 70  | no           | 315    | 78      |
| 11 |               |         |     |     |      |             |     |              |        |         |
| 12 | Hypertrophic  | D76     | 55  | M   | W    | CVA         | 60  | yes          | 645    | 160     |
| 13 |               | D85     | 59  | F   | B    | CVA         | 60  | yes          | 380    | 66      |
| 14 |               | D111    | 52  | M   | W    | CVA         | 85  | yes          | 619    | 100     |
| 15 |               | D120    | 50  | M   | W    | CVA         | 65  | yes          | 640    | 87      |
| 16 |               | D163    | 52  | M   | W    | CVA         | 70  | yes          | 505    | 115     |
| 17 |               |         |     |     |      |             |     |              |        |         |
| 18 | Heart failure | X2109   | 58  | M   | W    | DCM         | 20  | no           | 590    | 109     |
| 19 |               | X2134   | 48  | M   | W    | DCM         | 10  | no           | 502    | 73      |
| 20 |               | X2155   | 66  | M   | W    | DCM         | N/A | no           | 691    | 89      |
| 21 |               | X2158   | 45  | M   | W    | DCM         | 15  | no           | 566    | 67      |
| 22 |               | X2172   | 47  | M   | W    | DCM         | 20  | no           | 440    | 69      |
| 23 |               | X2190   | 65  | M   | W    | DCM         | 10  | yes          | 704    | 76      |
| 24 |               | X2211   | 52  | M   | W    | DCM         | 15  | yes          | 486    | 95      |
| 25 |               | X2226   | 53  | M   | W    | DCM         | 20  | no           | 618    | 84      |
| 26 |               | X2240   | 40  | M   | W    | DCM         | 10  | no           | 286    | 67      |
| 27 |               | X2254   | 32  | M   | W    | DCM         | 15  | no           | 731    | 117     |
| 28 | X2255         | 48      | M   | W   | DCM  | N/A         | no  | 390          | 73     |         |
| 29 | X2260         | 56      | M   | W   | DCM  | 20          | no  | 386          | 84     |         |

30 \*Abbreviations: BW: body weight; CVA: cerebrovascular accident; DCM: dilated cardiomyopathy; EF: ejection fraction; GSW: gun  
 31 shot wound; HW: heart weight; MVA: motor vehicle accident
